# Supplementary material for: Exploring Sources of Social Support During Pregnancy- a Qualitative Study in Rural Southern India
Source: Research Square preprint supplement (doi:10.21203/rs.3.rs-4690470/v1), 2025-10-31
Supplement: Supplementary file 1 [file f561fec1782af9f6341bcdd2.docx]

Appendix 1: Focus Group Discussion Guide

1.1 Questions for community health workers, midwives, anganwadi and ASHA workers

Hello, I’m [name and explanation of where you are from] and I’m going to facilitate this discussion today. [Name] is acting as observer today and will be making some notes. We would like to talk to you about your jobs and what you see as the issues for mothers and children in the villages served by the VMH. This discussion should take no more than one hour.

Before we get started, I’d just like to run through a few things with you. All information collected will be anonymous and confidential, so no names will appear on anything. If we use each others’ names during the discussion, they will be replaced by a code when the tapes are transcribed…

Just a few guidelines for today:

- all views are valued and there are no right or wrong answers;
- although I shall be asking some questions and will make sure we finish on time, please feel free to speak to each other, not just me;
- what’s said in the room should be considered confidential.

What do you usually do about mobile phones in meetings? (They’ll say, turn off or put on silent!) Perhaps take any urgent calls outside the room to not disrupt the group.

Can I just check that you have all signed the registration sheet which confirms your consent to take part today and to have this discussion audio-recorded.

So let’s get started – could you firstly all say who you are and what your current job is, then once we’ve done that, we’ll turn the recorder on and get underway.

*Questions:*

What do you see as the main maternal and child health problems in the villages around the VMH?

What do you think will make it difficult for women in the villages to make changes to improve their health and their child’s health?

How do you currently work with the women in the villages?

What works well for you in supporting women and their children to be healthy? What are the best ways you have of supporting women and children to eat well?

What are the challenges of working with the women in the villages?

What else would you like to be able to do to support the women and children to improve their diets and their health?

How important do you think it is to the women to be healthy?

*Additional question for midwives, etc - what would make institutional deliveries more appealing to women?*

That’s all my questions. Do you have any questions you would like to ask me? Thank you for your time.

1.2 Questions for village elders and community leaders

Hello, I’m [name and explanation of where you are from] and I’m going to facilitate this discussion today. [Name] is acting as observer today and will be making some notes. We would like to talk to you about your village and what you see as the issues for mothers and children in your village. This discussion should take no more than one hour.

Before we get started, I’d just like to run through a few things with you. All information collected will be anonymous and confidential, so no names will appear on anything. If we use each others’ names during the discussion, they will be replaced by a code when the tapes are transcribed.

Just a few guidelines for today:

- all views are valued there are no right and no wrong answers;
- although I shall be asking some questions and will make sure we finish on time, please feel free to speak to each other, not just me;
- what’s said in the room should be considered confidential.

Can I just check that you have all signed the registration sheet which confirms your consent to take part today and to have this discussion audio-recorded?

*Questions:*

How do the women in your village spend their time?

What do you see as the main maternal and child health problems in your village? What might help reduce or solve these problems?

What practices do you have in your village to help women and children in your villages keep healthy?

What makes it difficult for you in your village to help young women and their families eat well and keep healthy?

How do things change in families when their women become pregnant?

Our study wants to make it easier for women to eat well and be healthy in pregnancy. How might you be able to help us do this?

What opportunities are there to grow food in the village?

What difficulties do you have with growing food in the village?

That’s all my questions. Do you have any questions you would like to ask me?

Thank you for your time.

1.3 Questions for village women, both pregnant and non-pregnant

Group discussions

Hello, I’m [name and explanation of where you are from] and I’m going to facilitate this discussion today. [Name] is acting as observer today and will be making some notes. We would like to talk to you about life for mothers and children in your village, what difficulties you face and what support you currently get to help with keeping you and your children healthy. This discussion should take no more than 45 minutes.

Before we get started, I’d just like to run through a few things with you. All information collected will be anonymous and confidential, so no names will appear on anything. If we use each others’ names during the discussion, they will be replaced by a code when the tapes are transcribed.

Just a few guidelines for today:

- all views are valued and there are no right of wrong answers;
- although I shall be asking some questions and will make sure we finish on time, please feel free to speak to each other, not just me;
- what’s said in the room should be considered confidential.

Can I just check that you have all signed the registration sheet which confirms your consent to take part today and to have this discussion audio-recorded?

*Questions:*

How do you in your village spend your time?

What changes when you become pregnant?

How does your family support you when you become pregnant?

How does the village support you when they become pregnant?

What do you eat when pregnant?

How do you feed your children? What foods are suitable for pregnant and breastfeeding women and infants to eat? And what foods are unsuitable?

Where do you get food from in your village?

How does your family decide which foods to eat?

How do people keep themselves clean in your village? What problems do you have keeping clean?

How do you get water in your village? What do you think of this?

What opportunities do women in your village have to meet and talk? How do you support each other?

What support for eating well and keeping healthy do women and children in your village currently have from community health workers? What additional support would you like to receive?

What opportunities do you have to grow food?

What difficulties do you have with growing food?

That’s all my questions. Do you have any questions you would like to ask me? Thank you for your time.

1.4 Questions for husbands, mothers and mothers-in-law

Hello, I’m [name and explanation of where you are from] and I’m going to facilitate this discussion today. [Name] is acting as observer today and will be making some notes. We would like to talk to you about mothers and children in your village, what difficulties you face as a village keeping healthy and what support you currently get in keeping healthy. This discussion should take no more than 45 minutes.

Before we get started, I’d just like to run through a few things with you. All information collected will be anonymous and confidential, so no names will appear on anything. If we use each others’ names during the discussion, they will be replaced by a code when the tapes are transcribed.

Just a few guidelines for today:

• all views are valued there are no right or wrong answers;

• although I shall be asking some questions and will make sure we finish on time, please feel free to speak to each other, not just me;

• what’s said in the room should be considered confidential.

Can I just check that you have all signed the registration sheet which confirms your consent to take part today and to have this discussion audio-recorded?

*Questions:*

What do you think the main health problems are for women and children in your village?

What is your role in promoting good health in your household?

What could be done differently in your household to help your family eat better and be more healthy?

How does your wife/daughter in law spend her time?

What makes it difficult for you in your household to maintain the health of your family?

What might make this easier?

How do you get food for your household?

How does your family decide which foods to eat?

How did/does this change when the women are pregnant?

What do very small children in your household eat?

What challenges, if any, has your family had in providing enough food for your household?

What opportunities do you have to grow food?

What difficulties do you have with growing food?

Our study wants to make it easier for women to eat well and be healthy in pregnancy. How might you be able to help us do this? What role do you think you might play in this?

*Additional questions for fathers:*

*What do men in your village think about their role in supporting their wives whilst pregnant? What more would you like to know about pregnancy and the health of your wife?*

*What would make men in your village think about going to antenatal classes?*

*What would men in your village think about taking vitamins or a supplement?*

*Additional questions for mothers and mothers in law:*

*When during pregnancy do daughters go back to their mothers to have their babies?*

*Why do they do this? How far do they travel and how long do they stay?*

*What do mothers do for their daughters whilst they are having their babies?*

That’s all my questions. Do you have any questions you would like to ask me? Thank you for your time.
